Development 135, 785 (2008) doi:10.1242/dev.020016

## FGF signals guide migration of mesenchymal cells, control skeletal morphogenesis and regulate gastrulation during sea urchin development

**Eric Röttinger, Alexandra Saudemont, Véronique Duboc, Lydia Besnardeau, David McClay and Thierry Lepage**

There was an error published in *Development* **135**, 353-365.

The title of this article was not corrected in the on-line version before publication. The correct title appears above. The printed version of the article is correct.

We apologise to the authors and to readers for this mistake.
